# Supplementary material for: DNMT3B Is an Oxygen-Sensitive De Novo Methylase in Human Mesenchymal Stem Cells
Source: MDPI journal article supplement (doi:10.3390/cells10051032), 2021-04-27
Supplement: s1 [file s1]

Table S2. Pyrosequencing primers

| Gene name | Annealing Temp (°C) | Forward primer          | Reverse primer           | Sequencing primer       | Product size |
|-----------|---------------------|-------------------------|--------------------------|-------------------------|--------------|
| DNMT1     | 61                  | 5'- TGGGGGAGGAATTA-3'   | 5'- AACTTTCTCCCCACACC-3' | 5'- TTGTGTAGAAATGGAA-3' | 230          |
| DNMT3A    | 61                  | 5'- GGAGAGGGTGAGAAGG-3' | 5'- TATCCCCCCCCCAATT-3'  | 5'- GTTTGTTGTTAGGAGT-3' | 196          |
| DNMT3B    | 61                  | 5'- GGGGATAGGAGAAGGG-3' | 5'- TCCTCACCTCCCTTA-3'   | 5'- GTTTGTTGTTAGGAGT-3' | 80           |
| DNMT3L    | 60                  | 5'- GGAGAGGAATAGAGTG-3' | 5'- AAAAATAACCCCTTCT-3'  | 5'- CCTCCATTCCAATACA-3' | 72           |
| TET1      | 61                  | 5'- GGGTTTAGGTTGTGG-3'  | 5'- CCCCAACTCCACCTAC-3'  | 5'- TTAAAGTTGTGGGGAT-3' | 81           |
| TET2      | 61                  | 5'- TGGTGAGGGGTGTTAG-3' | 5'- CCCTTTAAATACACT-3'   | 5'- CACTCCACCACCACT-3'  | 150          |
| TET3      | 61                  | 5'- TTGGGATAGGGGTTAG-3' | 5'- CCACTCCCTAATCTAT-3'  | 5'- GATAGGGGGGTTAGT-3'  | 88           |
