# Supplementary material for: DNMT3B Is an Oxygen-Sensitive De Novo Methylase in Human Mesenchymal Stem Cells
Source: MDPI journal article supplement (doi:10.3390/cells10051032), 2021-04-27
Supplement: s1 [file s1]

**A**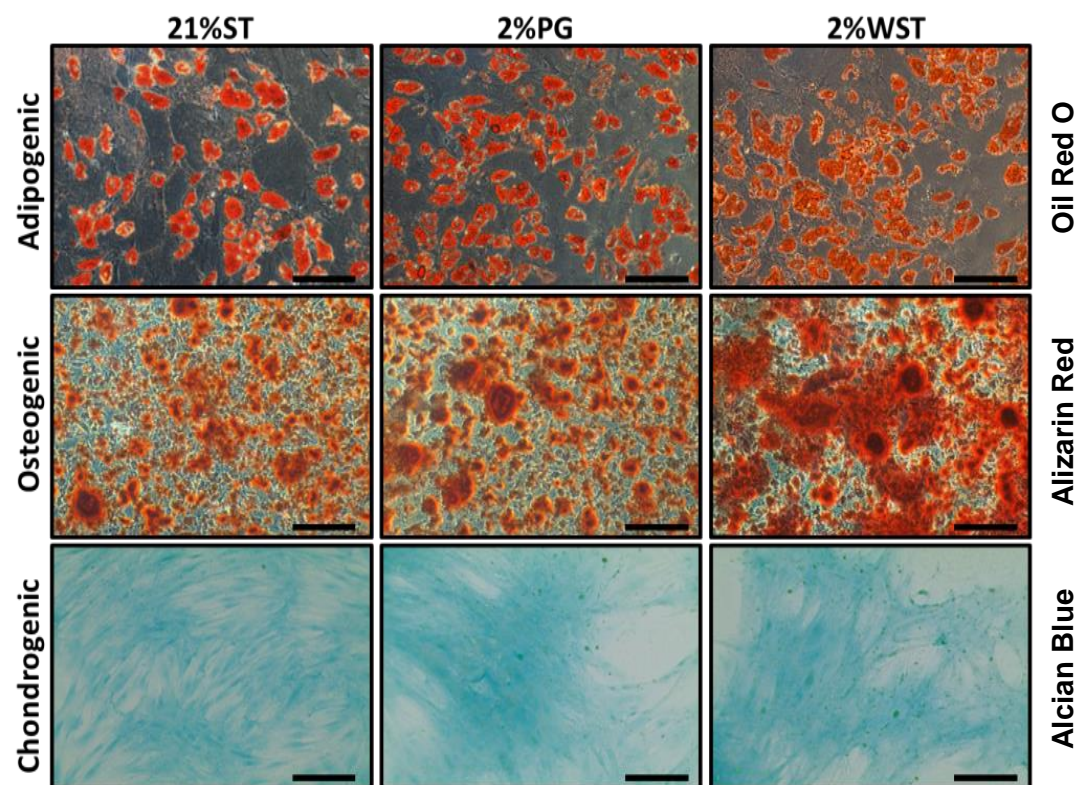**B**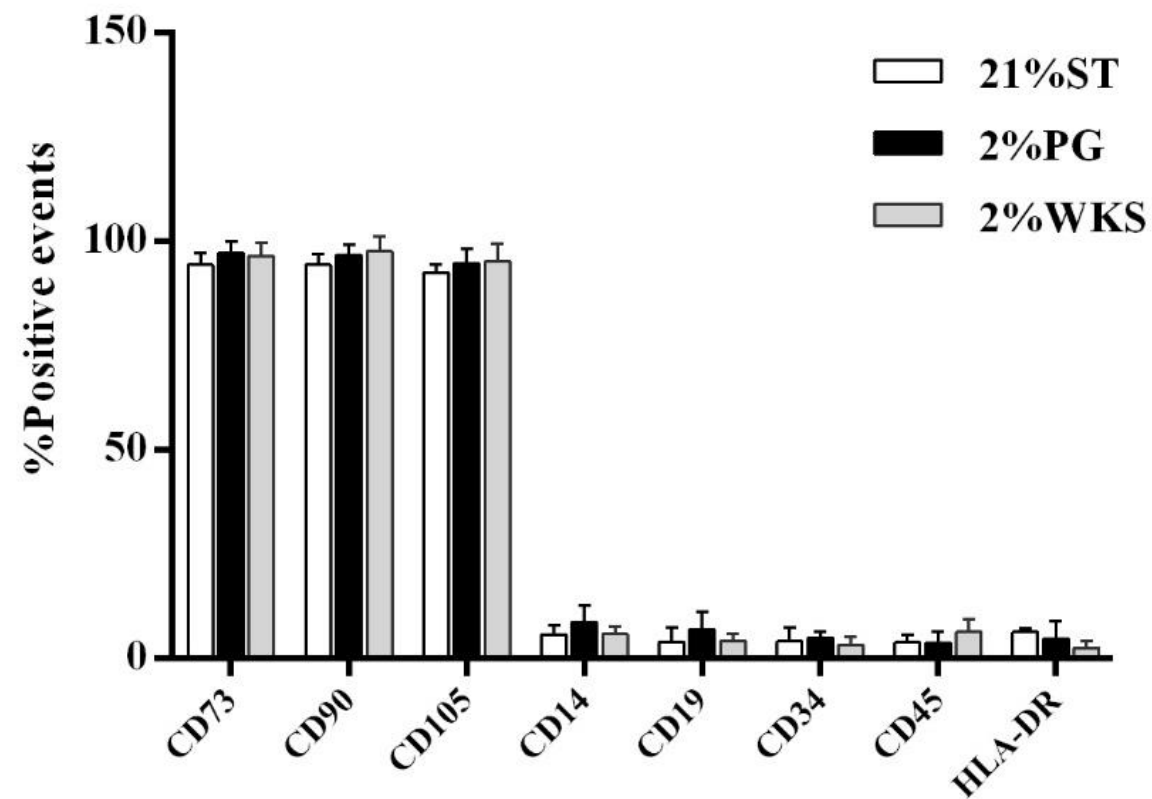

**Figure S1.** Immunophenotypic characterisation of BM- hMSCs. **(A)** Tri-lineage differentiation of MSC into adipocyte, osteocyte, and chondrocyte the scale bar equal 100  $\mu\text{m}$  for all image. **(B)** The percentage of positive event was quantified relative to the relevant isotype control marker; IgG1 (CD73, CD90, CD105, and CD19) or IgG2 (CD14, CD34, CD45, and HLA-DR((Human Leukocyte Antigen – DR isotype))). Expression of typically negative (CD14, CD19, CD37, CD45, HLA-DR) and typically positive (CD90, CD73 and CD105) MSC markers in the human mesenchymal stem cells. Y-axis indicates surface markers. X-axis indicates % of positive events. The values are mean ( $n=3$ ) and the error bar indicate standard deviation (SD).
