# Supplementary material for: DNMT3B Is an Oxygen-Sensitive De Novo Methylase in Human Mesenchymal Stem Cells
Source: MDPI journal article supplement (doi:10.3390/cells10051032), 2021-04-27
Supplement: s1 [file s1]

Table S1. RT-PCR primer sequences

| Primers | Sequence |                              | Product size |
|---------|----------|------------------------------|--------------|
| DNMT1   | F        | 5'CTCTCTCCGTTTGGTACATC 3'    | 245          |
|         | R        | 5'CTTTCCAAATCTTTGAGCCG 3'    |              |
| DNMT3A  | F        | 5'AGAGCAGAGGACGAGC 3'        | 192          |
|         | R        | 5'ATTATCGTGGTCTTTGGAGG 3'    |              |
| DNMT3B  | F        | 5'TAATAAGTCGAAGGTGCGTC3'     | 198          |
|         | R        | 5'TCTGAAGCCATTTGTTCTCG 3'    |              |
| TET1    | F        | 5'AGCTTACCAAAATCAGGTGG3'     | 221          |
|         | R        | 5'GCTGCTCATCTTGAGGAATA 3'    |              |
| TET2    | F        | 5'CCACTACCCCAACCAAGTAACA3'   | 272          |
|         | R        | 5'GTAGCTCTCCACTGCTACCAAAAA3' |              |
| TET3    | F        | 5'CTTTATGACTTCCCTCAGCG 3'    | 270          |
|         | R        | 5' AGCCTTTATTTCCACCTCCT 3'   |              |
| DNMT3L  | F        | 5'TGCTAGACAGACCCCATTTCTCT 3' | 274          |
|         | R        | 5'ATTGACCACTCAGGGCCATTG 3'   |              |
| OCT-4   | F        | 5'CATAGCCTGGGGTACCAAAATGGGG  | 536          |
|         | R        | 5'GCAATTTGCCAAGCTCCTGAAGCAG  |              |
| SOX-2   | F        | 5'CCATCCACACTCACGCAA 3'      | 204          |
|         | R        | 5'GCAAAGCTCCTACCGTACCACT 3'  |              |
| NANOG   | F        | 5'TGCAGGACTGCAGAGATTC 3'     | 300          |
|         | R        | 5'GGTGGCAGAAAAACAACCTGGC 3'  |              |
| β-actin | F        | 5' GCCACGGCTGCTTCCAGC 3'     | 528          |
|         | R        | 5'AGCCATGCCAATCTCATCTT 3'    |              |
| HIF1A   | F        | 5'CCACCTCTGACTTGCCTTTC 3'    | 702          |
|         | R        | 5'GCCGAGGGAATGGGCTTAC 3'     |              |
| HIF2A   | F        | 5'GGCGTCTGAACGTCTCAAAG 3'    | 788          |
|         | R        | 5'GAGCCGCAGAAGTCTCCA 3'      |              |
